# Supplementary material for: Anti-mitotic chemotherapeutics promote apoptosis through TL1A-activated death receptor 3 in cancer cells
Source: PubMed Central journal article supplement (PMC5951888; doi:10.1038/s41422-018-0018-6), 2018-03-01

**Supplementary information, Figure S9.** HT29 cells stably expressing DR3-Flag were incubated with 100nM taxol for the indicated time and stained with Flag antibody and DAPI. Scale bar: 10 $\mu$ m.

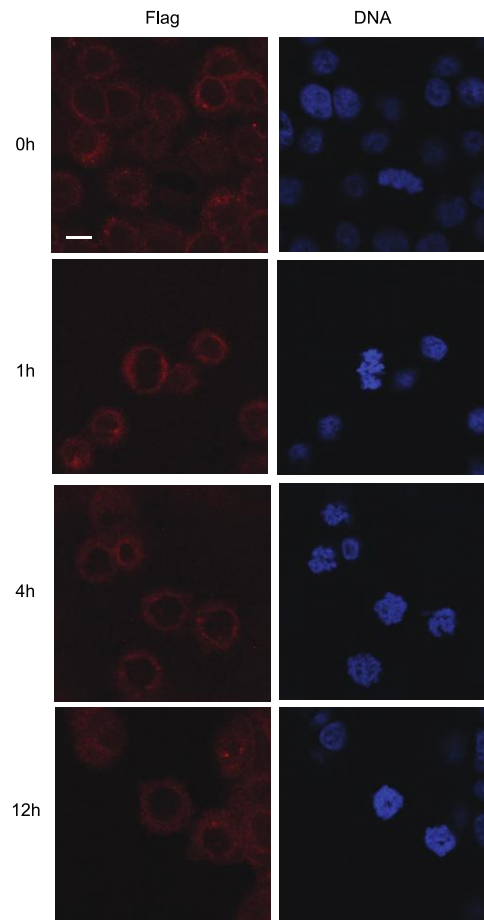

Supplement: 41422_2018_18_MOESM9_ESM.pdf [file 41422_2018_18_MOESM9_ESM.pdf]
