# Supplementary material for: Anti-mitotic chemotherapeutics promote apoptosis through TL1A-activated death receptor 3 in cancer cells
Source: PubMed Central journal article supplement (PMC5951888; doi:10.1038/s41422-018-0018-6), 2018-03-01

**Supplementary information, Figure S10.** The abundance of DR3 and TL1A in tumor and normal samples from a range of tissue types from The Cancer Genome Atlas (TCGA).

| Analysis Type by Cancer     | Cancer vs. Normal TL1A | Cancer vs. Normal DR3 |
|-----------------------------|------------------------|-----------------------|
| Bladder Cancer              |                        | 3                     |
| Brain and CNS Cancer        |                        | 2                     |
| Breast Cancer               | 2                      |                       |
| Cervical Cancer             |                        | 1                     |
| Colorectal Cancer           | 6                      | 1                     |
| Esophageal Cancer           |                        |                       |
| Gastric Cancer              |                        | 2                     |
| Head and Neck Cancer        |                        |                       |
| Kidney Cancer               |                        |                       |
| Leukemia                    |                        | 2                     |
| Liver Cancer                |                        |                       |
| Lung Cancer                 |                        |                       |
| Lymphoma                    |                        | 3                     |
| Melanoma                    |                        | 2                     |
| Myeloma                     |                        |                       |
| Other Cancer                |                        | 2                     |
| Ovarian Cancer              |                        |                       |
| Pancreatic Cancer           |                        |                       |
| Prostate Cancer             |                        | 2                     |
| Sarcoma                     |                        |                       |
| Significant Unique Analyses | 8                      | 12 7                  |
| Total Unique Analyses       | 281                    | 394                   |

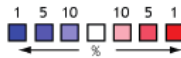

Supplement: 41422_2018_18_MOESM10_ESM.pdf [file 41422_2018_18_MOESM10_ESM.pdf]
